# Supplementary material for: Diverse Horizontally-Acquired Gene Clusters Confer Sucrose Utilization to Different Lineages of the Marine Pathogen Photobacterium damselae subsp. damselae
Source: MDPI journal article supplement (doi:10.3390/genes11111244), 2020-10-22
Supplement: s1 [file s1]

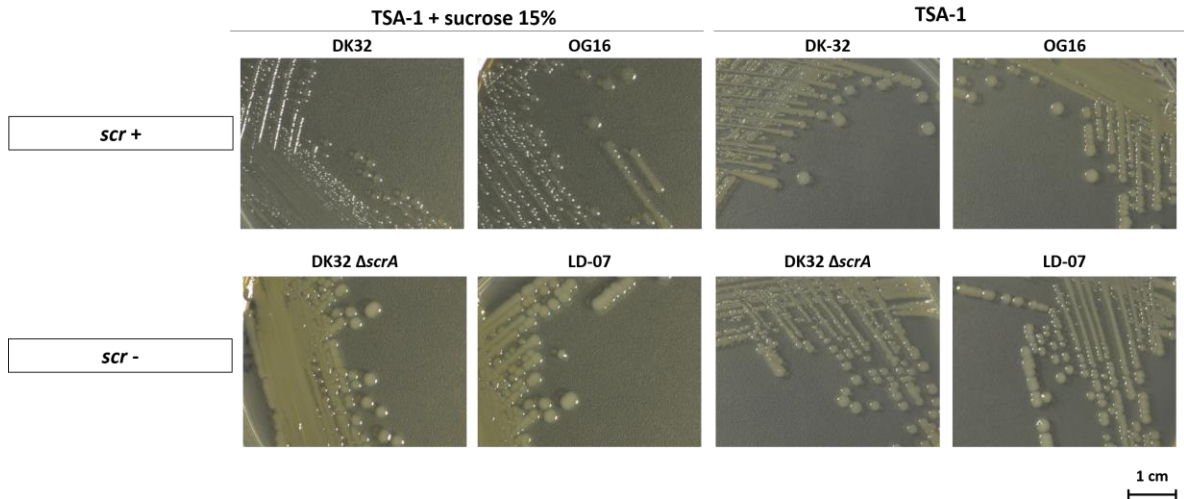

**Figure S1:** Colony morphologies of *Scr*<sup>+</sup> and *Scr*<sup>-</sup> *Pdd* strains grown in either plain TSA-1 or in TSA-1 supplemented with 15% sucrose. Strains harboring the *scr* gene cluster form flat and translucent colonies in presence of high concentrations of sucrose, while strains lacking a functional *scr* cluster form convex and whitish colonies. The colony phenotypes of *Scr*<sup>+</sup> and *Scr*<sup>-</sup> strains are indistinguishable on TSA-1 without added sucrose.
